# Supplementary material for: Efficacy and Safety of Patritumab Deruxtecan (HER3-DXd) in EGFR Inhibitor–Resistant, EGFR-Mutated Non–Small Cell Lung Cancer
Source: PubMed Central journal article supplement — Cancer Discov. 2021 Sep 21;12(1):74–89. doi: 10.1158/2159-8290.CD-21-0715 (PMC9401524; doi:10.1158/2159-8290.cd-21-0715), 2021-09-21
Supplement: cd-21-0715_supplementary_tables_and_figures_suppsd1.pdf [file cd-21-0715_supplementary_tables_and_figures_suppsd1.pdf]

## SUPPLEMENTARY TABLES AND FIGURES

## TABLES

Supplementary Table S1. Treatment Duration and Follow -Up

|                                                                  | Dose escalation     |                     |                     |                     | Dose expansion      | Pooled RDE          | All patients        |
|------------------------------------------------------------------|---------------------|---------------------|---------------------|---------------------|---------------------|---------------------|---------------------|
|                                                                  | 3.2 mg/kg<br>(N=4)  | 4.8 mg/kg<br>(N=15) | 5.6 mg/kg<br>(N=12) | 6.4 mg/kg<br>(N=5)  | 5.6 mg/kg<br>(N=45) | 5.6 mg/kg<br>(N=57) | All doses<br>(N=81) |
| Treatment duration, median (range), months                       | 6.1<br>(2.8-28.3)   | 5.6<br>(0.7-22.9)   | 3.8<br>(0.7-18.6)   | 9.7<br>(1.4-22.1)   | 5.5<br>(0.7-11.8)   | 5.5<br>(0.7-18.6)   | 5.7<br>(0.7-28.3)   |
| Follow-up after start of study treatment, median (range), months | 29.8<br>(29.3-31.8) | 20.6<br>(15.0-25.6) | 19.2<br>(17.9-19.9) | 27.7<br>(22.2-28.3) | 9.2<br>(5.2-12.7)   | 10.2<br>(5.2-19.9)  | 11.8<br>(5.2-31.8)  |
| Patients remaining on treatment, n (%)                           | 0                   | 0                   | 2 (17)              | 0                   | 16 (36)             | 18 (32)             | 18 (22)             |
| Discontinued treatment, n (%)                                    | 4 (100)             | 15 (100)            | 10 (83)             | 5 (100)             | 29 (64)             | 39 (68)             | 63 (78)             |
| Primary reason for discontinuation, n (%)                        |                     |                     |                     |                     |                     |                     |                     |
| Progressive disease (per RECIST 1.1) <sup>a</sup>                | 3 (75)              | 8 (53)              | 8 (67)              | 4 (80)              | 14 (31)             | 22 (39)             | 37 (46)             |
| Clinical progression <sup>a</sup>                                | 1 (25)              | 2 (13)              | 0                   | 1 (20)              | 6 (13)              | 6 (11)              | 10 (12)             |
| Adverse event                                                    | 0                   | 1 (7)               | 1 (8)               | 0                   | 4 (9)               | 5 (9)               | 6 (7)               |
| Withdrawal of consent                                            | 0                   | 3 (20)              | 0                   | 0                   | 2 (4)               | 2 (4)               | 5 (6)               |
| Investigator decision                                            | 0                   | 1 (7)               | 0                   | 0                   | 1 (2)               | 1 (2)               | 2 (2)               |
| Death                                                            | 0                   | 0                   | 1 (8)               | 0                   | 2 (4)               | 3 (5)               | 3 (4)               |

<sup>a</sup> Assessed by investigator.

**Supplementary Table S2.** Safety Summary by Dose Group

|                                                 | Dose escalation    |                     |                     |                    | Dose expansion      |
|-------------------------------------------------|--------------------|---------------------|---------------------|--------------------|---------------------|
|                                                 | 3.2 mg/kg<br>(N=4) | 4.8 mg/kg<br>(N=15) | 5.6 mg/kg<br>(N=12) | 6.4 mg/kg<br>(N=5) | 5.6 mg/kg<br>(N=45) |
| Any TEAE                                        | 4 (100)            | 15 (100)            | 12 (100)            | 5 (100)            | 45 (100)            |
| Grade ≥3 TEAEs                                  | 0                  | 7 (47)              | 8 (67)              | 3 (60)             | 34 (76)             |
| TEAEs associated with death                     | 0                  | 1 (7)               | 1 (8)               | 0                  | 3 (7)               |
| TEAEs associated with treatment discontinuation | 0                  | 1 (7)               | 1 (8)               | 0                  | 5 (11)              |
| TEAEs associated with dose interruption         | 1 (25)             | 5 (33)              | 1 (8)               | 3 (60)             | 20 (44)             |
| TEAEs associated with dose reduction            | 0                  | 3 (20)              | 2 (17)              | 3 (60)             | 10 (22)             |
| Serious TEAEs                                   | 1 (25)             | 6 (40)              | 5 (42)              | 0                  | 20 (44)             |
| Treatment-related TEAEs                         | 4 (100)            | 14 (93)             | 12 (100)            | 5 (100)            | 43 (96)             |
| Grade ≥3 TEAEs                                  | 0                  | 4 (27)              | 5 (42)              | 3 (60)             | 26 (58)             |
| TEAEs associated with death                     | 0                  | 0                   | 0                   | 0                  | 0                   |
| Serious TEAEs                                   | 0                  | 3 (20)              | 3 (25)              | 0                  | 9 (20)              |

**Supplementary Table S3.** Clinical Activity by Dose Group as Assessed by BICR according to RECIST 1.1

|                                                    | Dose escalation    |                     |                    |                    | Dose expansion      | Pooled RDE with prior PBC |
|----------------------------------------------------|--------------------|---------------------|--------------------|--------------------|---------------------|---------------------------|
|                                                    | 3.2 mg/kg (N=4)    | 4.8 mg/kg (N=15)    | 5.6 mg/kg (N=12)   | 6.4 mg/kg (N=5)    | 5.6 mg/kg (N=45)    | 5.6 mg/kg (N=52)          |
| Confirmed ORR, % (n) [95% CI]                      | 25 (1) [0.6-80.6]  | 33 (5) [11.8-61.6]  | 42 (5) [15.2-72.3] | 80 (4) [28.4-99.5] | 38 (17) [23.8-53.5] | 37 (19) [23.6-51.0]       |
| Best overall response, n (%)                       | CR, 0              | CR, 0               | CR, 0              | CR, 0              | CR, 1 (2)           | CR, 1 (2)                 |
|                                                    | PR, 1 (25)         | PR, 5 (33)          | PR, 5 (42)         | PR, 4 (80)         | PR, 16 (36)         | PR, 18 (35)               |
|                                                    | SD, 3 (75)         | SD, 5 (33)          | SD, 4 (33)         | SD, 1 (20)         | SD, 15 (33)         | SD, 19 (37)               |
|                                                    | PD, 0              | PD, 2 (13)          | PD, 2 (17)         | PD, 0              | PD, 7 (16)          | PD, 8 (15)                |
|                                                    | NE, 0              | NE, 3 (20)          | NE, 1 (8)          | NE, 0              | NE, 6 (13)          | NE, 6 (12)                |
| Disease control rate, <sup>a</sup> % (n) [95% CI]  | 100 (4) [39.8-100] | 67 (10) [38.4-88.2] | 75 (9) [42.8-94.5] | 100 (5) [47.8-100] | 71 (32) [55.7-83.6] | 73 (38) [59.0-84.4]       |
| Time to response, median (range), months           | 5.5 (5.5-5.5)      | 2.6 (1.2-5.4)       | 1.4 (1.3-2.6)      | 2.7 (1.2-4.2)      | 2.7 (1.2-5.4)       | 2.7 (1.2-5.4)             |
| Duration of response, median (95% CI), months      | 11.0 (NE-NE)       | 5.6 (4.1-17.5)      | 5.0 (3.0-7.0)      | 8.0 (4.1-11.1)     | NE (5.6-NE)         | 7.0 (5.6-NE)              |
| Progression-free survival, median (95% CI), months | 4.9 (2.8-16.5)     | 5.4 (1.4-11.2)      | 5.6 (1.4-8.3)      | 11.0 (7.6-13.7)    | 8.3 (4.7-NE)        | 8.2 (4.4-NE)              |
| Overall survival, median (95% CI), months          | 12.4 (7.7-NE)      | 16.8 (6.4-NE)       | NE (4.4-NE)        | 23.2 (11.5-NE)     | 11.6 (8.2-11.6)     | NE (11.6-NE)              |

PBC, platinum-based chemotherapy.

<sup>a</sup> Disease control rate = rate of confirmed BOR of CR, PR, or SD.

**Supplementary Table S4.** Adverse Events of Any Causality Occurring in  $\geq 15\%$  of Patients

| TEAEs, n (%)                              | Pooled RDE<br>5.6 mg/kg<br>(N=57) | All patients<br>3.2/4.8/5.6/6.4 mg/kg<br>(N=81) |
|-------------------------------------------|-----------------------------------|-------------------------------------------------|
| Fatigue                                   | 37 (65)                           | 52 (64)                                         |
| Nausea                                    | 34 (60)                           | 49 (60)                                         |
| Platelet count decreased/thrombocytopenia | 30 (53)                           | 40 (49)                                         |
| Decreased appetite                        | 24 (42)                           | 32 (40)                                         |
| Vomiting                                  | 18 (32)                           | 30 (37)                                         |
| Alopecia                                  | 17 (30)                           | 26 (32)                                         |
| Neutrophil count decreased/neutropenia    | 20 (35)                           | 26 (32)                                         |
| Anemia/hemoglobin decreased               | 19 (33)                           | 24 (30)                                         |
| Constipation                              | 17 (30)                           | 23 (28)                                         |
| Hypokalemia                               | 12 (21)                           | 17 (21)                                         |
| Diarrhea                                  | 11 (19)                           | 16 (20)                                         |
| Dyspnea                                   | 11 (19)                           | 16 (20)                                         |
| Cough                                     | 10 (18)                           | 15 (19)                                         |
| Aspartate aminotransferase increased      | 7 (12)                            | 13 (16)                                         |
| Dizziness                                 | 9 (16)                            | 13 (16)                                         |

**Supplementary Table S5.** Protocol Recommendations for Management of Suspected Interstitial Lung Disease

| Worst toxicity grade<br>NCI-CTCAE v5.0 | <b>Schedule modification for HER3-DXd</b>                                                                                                                                                                                                                                                                                                                                                                                                                                                                                                                                                                                                                                                                                                                                                                                                                                                                                                                                                                                                                   |
|----------------------------------------|-------------------------------------------------------------------------------------------------------------------------------------------------------------------------------------------------------------------------------------------------------------------------------------------------------------------------------------------------------------------------------------------------------------------------------------------------------------------------------------------------------------------------------------------------------------------------------------------------------------------------------------------------------------------------------------------------------------------------------------------------------------------------------------------------------------------------------------------------------------------------------------------------------------------------------------------------------------------------------------------------------------------------------------------------------------|
| Grade 1                                | <p>The administration of HER3-DXd must be delayed. HER3-DXd can be restarted only if the event is fully resolved to grade 0:</p> <ul style="list-style-type: none"> <li>• If resolved in <math>\leq 28</math> days from day of onset, maintain dose.</li> <li>• If resolved in <math>&gt; 28</math> days from day of onset, reduce dose 1 level.</li> </ul> <p>Toxicity management:</p> <ul style="list-style-type: none"> <li>• Monitor and closely follow up in 2 to 7 days for onset of clinical symptoms and pulse oximetry.</li> <li>• Consider follow-up imaging in 1 to 2 weeks (or as clinically indicated).</li> <li>• Consider starting systemic steroids (eg, at least 0.5 mg/kg/day prednisone or equivalent) until improvement, followed by gradual taper over at least 4 weeks.</li> <li>• If diagnostic observations worsen despite initiation of corticosteroids, follow grade 2 guidelines (if patient is asymptomatic, then patient should still be considered as having toxicity grade 1 even if steroid treatment is given).</li> </ul> |
| Grade 2                                | <p>Permanently discontinue patient from HER3-DXd.</p> <p>Toxicity management:</p> <ul style="list-style-type: none"> <li>• Promptly start systemic steroids (eg, at least 1 mg/kg/day prednisone or equivalent) for a minimum of 14 days or until complete resolution of clinical symptoms and chest CT scan findings, followed by gradual taper over at least 4 weeks.</li> <li>• Monitor symptoms closely.</li> <li>• Reimage as clinically indicated.</li> <li>• If worsening or no improvement in clinical or diagnostic observations in 5 days, <ul style="list-style-type: none"> <li>○ Consider increasing dose of steroids (eg, 2 mg/kg/day prednisone or equivalent); administration may be switched to IV (eg, methylprednisolone).</li> <li>○ Reconsider additional workup for alternative etiologies.</li> </ul> </li> </ul>                                                                                                                                                                                                                    |

|                     |                                                                                                                                                                                                                                                                                                                                                                                                                                                                                                                                                                                                                                                                                                                                                                                                                    |
|---------------------|--------------------------------------------------------------------------------------------------------------------------------------------------------------------------------------------------------------------------------------------------------------------------------------------------------------------------------------------------------------------------------------------------------------------------------------------------------------------------------------------------------------------------------------------------------------------------------------------------------------------------------------------------------------------------------------------------------------------------------------------------------------------------------------------------------------------|
|                     | <ul style="list-style-type: none"> <li>○ Escalate care as clinically indicated.</li> </ul>                                                                                                                                                                                                                                                                                                                                                                                                                                                                                                                                                                                                                                                                                                                         |
| <p>Grade 3 or 4</p> | <p>Permanently discontinue subject from HER3-DXd.</p> <p>Toxicity management:</p> <ul style="list-style-type: none"> <li>• Hospitalization required.</li> <li>• Promptly initiate empiric high-dose methylprednisolone IV treatment (eg, 500 to 1000 mg/day for 3 days), followed by at least 1.0 mg/kg/day of prednisone (or equivalent) for a minimum of 14 days or until complete resolution of clinical symptoms and chest CT findings, followed by gradual taper over at least 4 weeks.</li> <li>• Reimage as clinically indicated.</li> <li>• If still no improvement within 3 to 5 days,             <ul style="list-style-type: none"> <li>• Reconsider additional workup for alternative etiologies.</li> <li>• Consider other immunosuppressants and/or treat per local practice.</li> </ul> </li> </ul> |

**Supplementary Table S6.** Pharmacokinetic Properties of Released MAAA-1181a (HER3-DXd Payload) and MAAA-1181a Conjugated Antibody for All Dose Groups (N=81<sup>a</sup>; data are mean [SD])

| MAAA-1181a conjugated antibody | Dose escalation (frozen liquid formulation) |                  |                  |                  | Dose expansion (lyophilized powder formulation) |
|--------------------------------|---------------------------------------------|------------------|------------------|------------------|-------------------------------------------------|
|                                | 3.2 mg/kg (N=4)                             | 4.8 mg/kg (N=9)  | 5.6 mg/kg (N=10) | 6.4 mg/kg (N=5)  | (5.6 mg/kg; N=28)                               |
| $C_{max}$ , ug/mL              | 72.6 (9.7)                                  | 105 (22.4)       | 130 (28.9)       | 141 (24.1)       | 121 (20.7)                                      |
| $AUC_{last}$ , ug•day/mL       | 227 (71.5)                                  | 424 (148)        | 597 (175)        | 572 (93.8)       | 515 (142)                                       |
| $T_{max}$ , h                  | 2.67 (1.16)                                 | 2.49 (1.45)      | 1.57 (0.06)      | 1.57 (0.07)      | 2.71 (1.33)                                     |
| $AUC_{inf}$ , ug•day/mL        | 232 (74.6)                                  | 450 (175)        | 666 (217)        | 649 (109)        | 556 (174)                                       |
| $t_{1/2}$ , days               | 3.64 (1.14)                                 | 4.90 (1.06)      | 6.73 (1.54)      | 6.95 (2.46)      | 5.60 (1.32)                                     |
| CL, mL/day/kg                  | 15.3 (6.44)                                 | 12.2 (4.30)      | 9.47 (3.92)      | 10.3 (1.97)      | 10.9 (3.03)                                     |
| V <sub>ss</sub> , mL/kg        | 62.2 (8.08)                                 | 69.4 (17.6)      | 71.9 (15.5)      | 90.9 (19.6)      | 72.9 (12.9)                                     |
| Released MAAA-1181a            | Dose escalation (frozen liquid formulation) |                  |                  |                  | Dose expansion (lyophilized powder formulation) |
|                                | 3.2 mg/kg (N=4)                             | 4.8 mg/kg (N=10) | 5.6 mg/kg (N=10) | 6.4 mg/kg (N=3)  | (5.6 mg/kg; N=30)                               |
| $C_{max}$ , ng/mL              | 13.9 (7.6)                                  | 13.3 (3.3)       | 21.7 (8.0)       | 21.7 (6.4)       | 22.5 (7.6)                                      |
| $AUC_{last}$ , ng•day/mL       | 24.2 (10.2)                                 | 31.5 (8.5)       | 47.4 (10.4)      | 46.4 (9.2)       | 48.3 (17.8)                                     |
| $T_{max}$ , h                  | 3.66 (0.15)                                 | 3.53 (0.14)      | 3.75 (0.62)      | 3.49 (0.02)      | 3.66 (0.71)                                     |
| $AUC_{inf}$ , ng•day/mL        | 24.5 (10.2)                                 | 29.9 (7.2; n=8)  | 51.1 (10.0; n=8) | 52.8 (8.8; n=2)  | 49.1 (18.6; n=27)                               |
| $t_{1/2}$ , days               | 4.38 (0.77)                                 | 4.46 (0.86; n=8) | 5.80 (1.22; n=8) | 5.91 (0.29; n=2) | 4.95 (1.08; n=27)                               |

$AUC_{inf}$ , area under the concentration vs time curve from time zero extrapolated to infinity;  $AUC_{last}$ , area under the concentration vs time curve from time zero to the time of the last quantifiable concentration; CL, weight-adjusted total body clearance;  $t_{1/2}$ , terminal elimination half-life;  $T_{max}$ , time of observed  $C_{max}$ ; V<sub>ss</sub>, volume of distribution at steady state.

<sup>a</sup> Although patients with missing data points were not automatically excluded from this analysis, not all patients had sufficient PK data points to warrant inclusion.

**Supplementary Table S7.** Geometric Mean Ratios of Cycle 1 PK Parameters for Lyophilized Powder Drug Product (Dose-Expansion Cohort 1) and Frozen Liquid Drug Product (Dose Escalation) of HER3-DXd at 5.6 mg/kg Q3W<sup>a</sup>

| Analyte                        | PK parameters                  | Lyo-DP<br>geometric<br>means<br>(N=14) | FL-DP<br>geometric<br>means<br>(N=10) | Ratio of<br>geometric<br>means<br>(Lyo/FL) (%) | 90% CI for the<br>ratio of geometric<br>means (%) |
|--------------------------------|--------------------------------|----------------------------------------|---------------------------------------|------------------------------------------------|---------------------------------------------------|
| MAAA-1181a conjugated antibody | C <sub>max</sub> (µg/mL)       | 122.62                                 | 127.22                                | 96.4                                           | 83.6, 111.1                                       |
|                                | AUC <sub>last</sub> (d•µg/mL)  | 534.54                                 | 571.61                                | 93.5                                           | 77.6, 112.7                                       |
|                                | AUC <sub>0-21d</sub> (d•µg/mL) | 535.06                                 | 572.98                                | 93.4                                           | 77.4, 112.6                                       |
| Released payload MAAA-1181a    | C <sub>max</sub> (ng/mL)       | 21.80                                  | 20.28                                 | 107.5                                          | 79.5, 145.4                                       |
|                                | AUC <sub>last</sub> (d•ng/mL)  | 46.17                                  | 46.30                                 | 99.7                                           | 82.0, 121.2                                       |
|                                | AUC <sub>0-21d</sub> (d•ng/mL) | 44.77<br>n=12                          | 48.11<br>n=8                          | 93.0                                           | 75.0, 115.4                                       |

AUC<sub>0-21d</sub>, area under the serum concentration-time curve from 0 to 21 days; CI, confidence interval; FL-DP, frozen liquid drug product; lyo-DP, lyophilized powder drug product; max, maximum; min, minimum.

<sup>a</sup> Patients in the dose escalation 5.6 mg/kg group (frozen liquid formulation) and dose-expansion Cohort 1 (5.6mg/kg; lyophilized powder formulation), who were dosed on or before December 19, 2019, were included in a PK comparability summary. The analysis was generated using only PK-evaluable patients who had all PK data points at predose, end of infusion, at 2, 4, and 8 hours post-infusion, and on Day 8, Day 15, Day 21 after the end of infusion.



**FIGURES**

**Supplementary Figure S1.** Study design. The dose escalation part and the dose expansion Cohorts 1 and 3 enrolled patients with *EGFR* activating mutations. The current paper reports data for patients in dose escalation and dose expansion cohort 1, including efficacy data for the pooled population of patients receiving the RDE. Cohorts 2 and 3 of the dose expansion part will be reported separately.

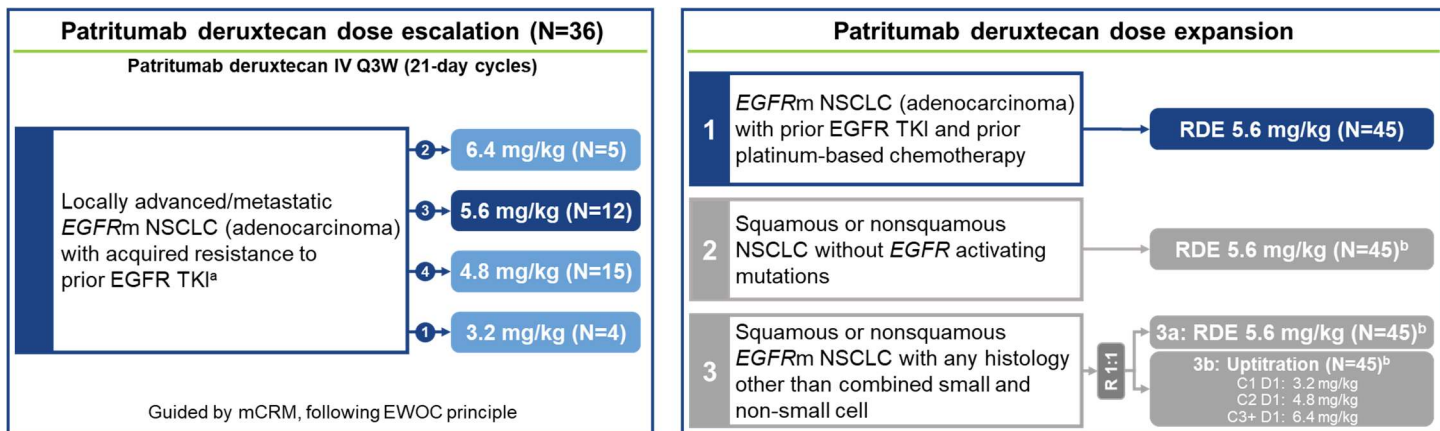

Recommended dose for expansion: HER3-DXd 5.6 mg/kg IV Q3W

*EGFR*m NSCLC, NSCLC with *EGFR* activating mutations; mCRM, modified continual reassessment method.

<sup>a</sup> Per Jackman criteria.

<sup>b</sup> Planned enrollment.

**Supplementary Figure S2.** PFS as assessed by BICR and OS in patients treated with HER3-DXd at 5.6 mg/kg according to prior treatment. Kaplan-Meier plot of PFS (A) and OS (B) for patients with prior platinum-based chemotherapy (N=52); Kaplan-Meier plot of PFS (C) and OS (D) for patients with prior platinum-based chemotherapy and osimertinib (N=44).

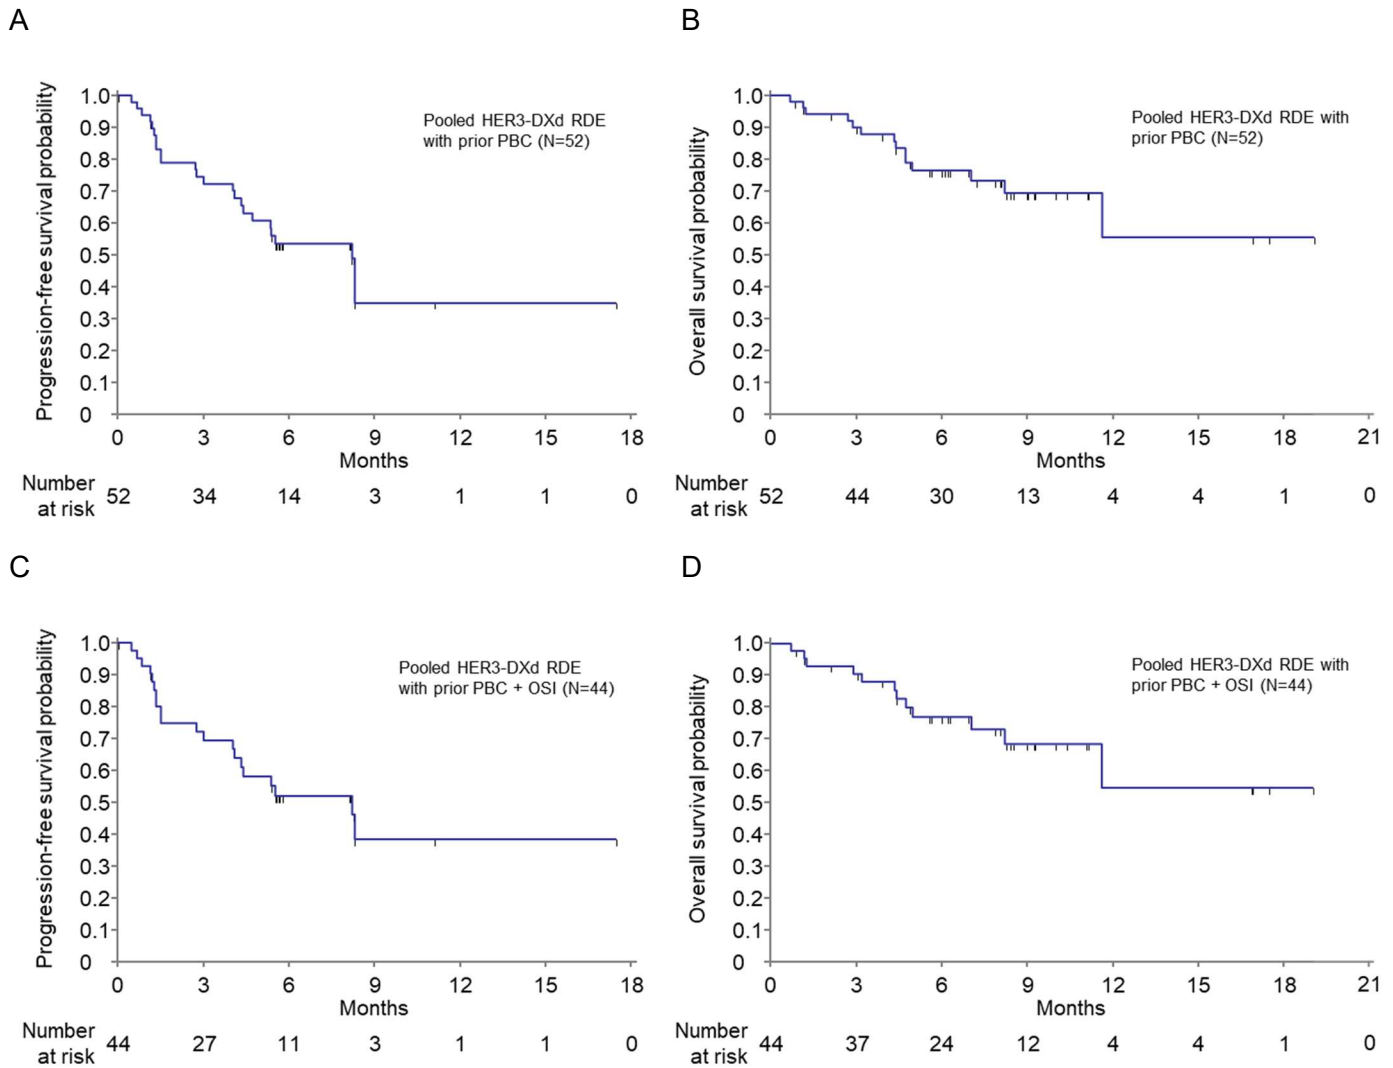

PBC, platinum-based chemotherapy; OSI, osimertinib.

**Supplementary Figure S3.** Representative examples of IHC staining showing membrane H-scores that are: (A) high, H-score 245; (B) medium (due to localized strong staining), H-score 180; (C) medium (due to widespread medium staining), H-score 175; and (D) low, H-score 2.

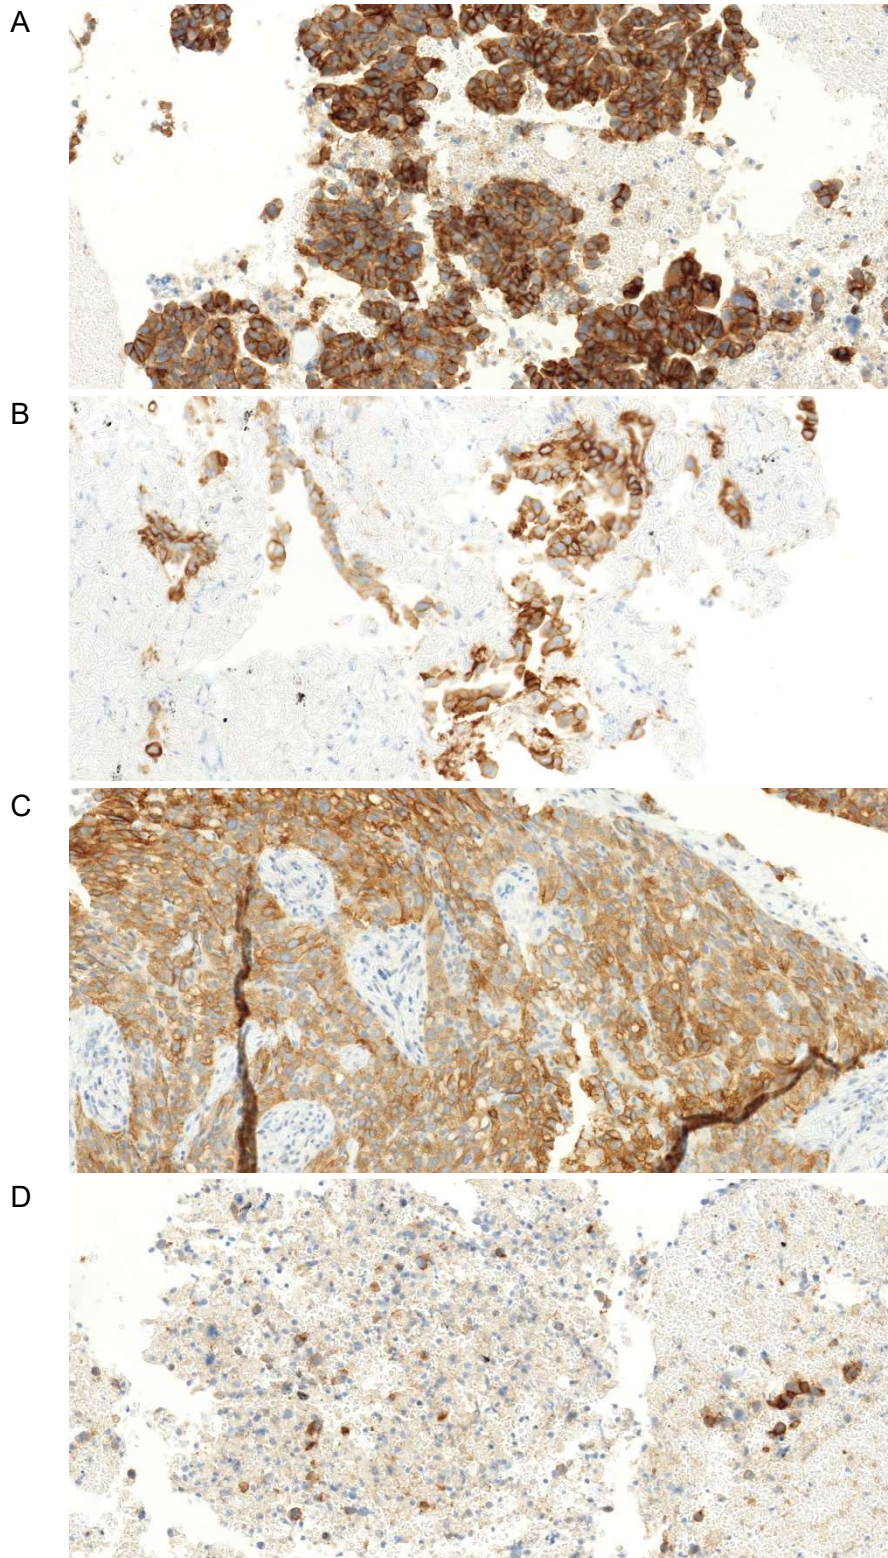

**Supplementary Figure S4.** Presence of resistance-associated genomic alterations detected in tumor tissue or blood ctDNA collected prior to study treatment in patients receiving HER3-DXd 5.6 mg/kg (N=57). The chart depicts each instance of a detected known genomic alteration. The category of “Not Known” represents instances of individual patients who had no detected known genomic alteration.

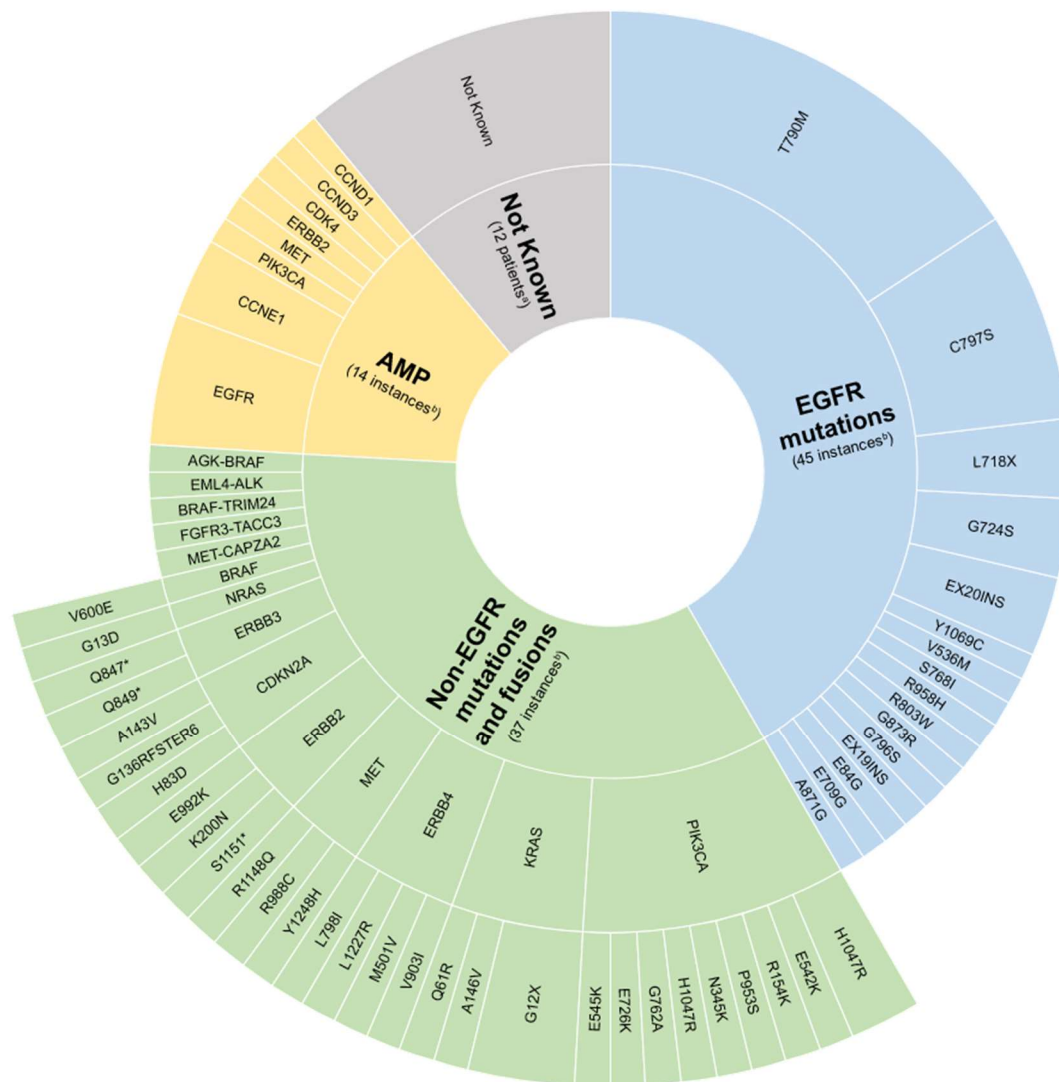

AMP, amplifications.

<sup>a</sup> Although it is possible that any of the patients had 1 or more additional unknown resistance-associated genomic alterations, the category of “Not Known” only represents instances of individual patients (n=12) who had no detected known genomic alteration.

<sup>b</sup> The total instances of known resistance-associated genomic alterations detected (n=96) was larger than the number patients with known genomic alterations (n=45) because more than 1 genomic alteration was sometimes present in a single patient (**Figure 1**).

**Supplementary Figure S5.** PK profile of HER3-DXd. (A) Cycle 1 mean (SD) serum concentration- time profile of MAAA-1181a conjugated antibody at doses of 3.2, 4.8, 5.6, and 6.4 mg/kg IV Q3W. (B) Cycle 1 mean (SD) serum concentration-time curve of MAAA-1181a conjugated antibody and released MAAA-1181a at a dose of 5.6 mg/kg Q3W.

**A**

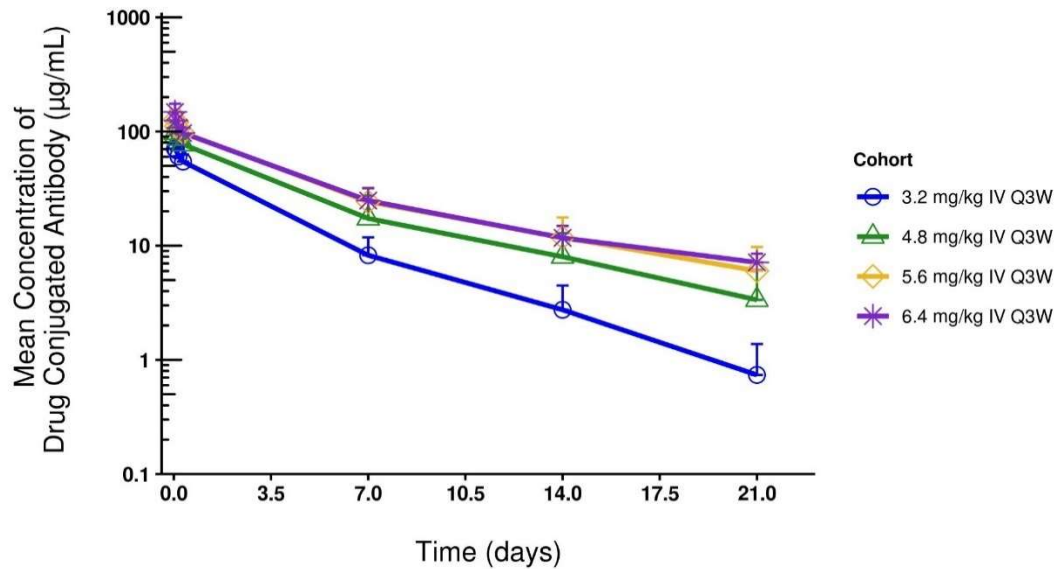

**B**

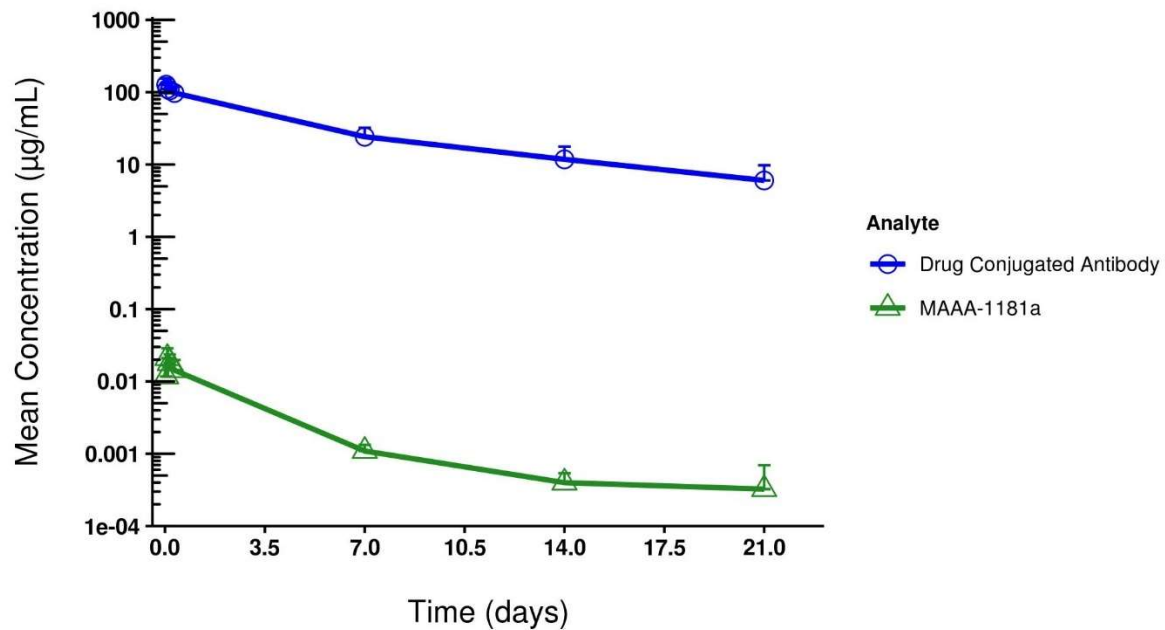

**Supplementary Figure S6.** Analysis of the dose proportionality of MAAA-1181a conjugated antibody for (A)  $AUC_{last}$  and (B)  $C_{max}$ .

**A**

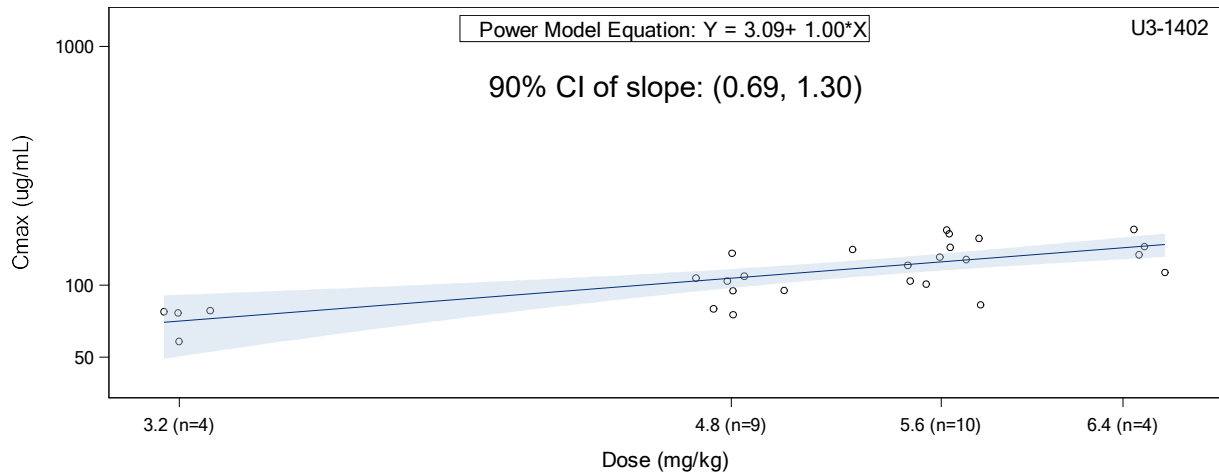

Subjects from dose escalation part dosed at 3.2, 4.8, 5.6 and 6.4 mg/kg are included. The straight line is the Power Model regression line. The shade is 90% confidence band.

Power Model:  $Y = \alpha + \beta * X$ , where  $Y = \log_{10}$  of the PK parameters  $C_{max}$ ,  $AUC_{last}$ , and  $AUC_{0-21d}$ ,  $X = \log_{10}$  of actual dose taken.  
 n : number of subjects within each planned dose.

**B**

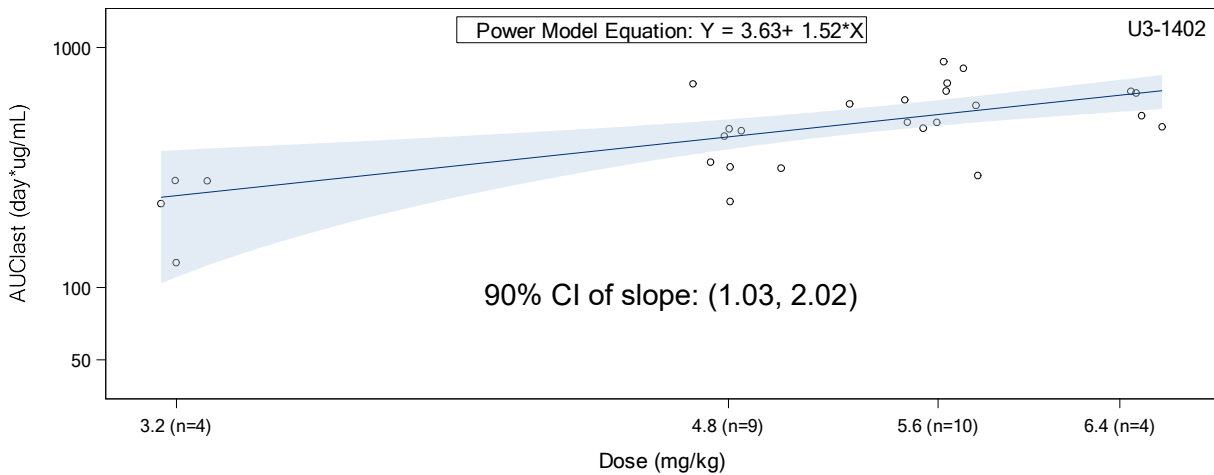

Subjects from dose escalation part dosed at 3.2, 4.8, 5.6 and 6.4 mg/kg are included. The straight line is the Power Model regression line. The shade is 90% confidence band.

Power Model:  $Y = \alpha + \beta * X$ , where  $Y = \log_{10}$  of the PK parameters  $C_{max}$ ,  $AUC_{last}$ , and  $AUC_{0-21d}$ ,  $X = \log_{10}$  of actual dose taken.  
 n : number of subjects within each planned dose.
